# Supplementary material
Source: publisher figshare collection journal article supplement (https://geolsoc.figshare.com/articles/dataset/_/3454919)
Supplement: Supplementary file 1 [file 1]

**Table 1.** REE and major ions concentrations in bulk precipitation (the Roman numeral signifies the number of the quarter (I–IV), the Arabic numeral indicates the year).

|        | Y<br>( $\mu\text{g l}^{-1}$ ) | La<br>( $\mu\text{g l}^{-1}$ ) | Ce<br>( $\mu\text{g l}^{-1}$ ) | Pr<br>( $\mu\text{g l}^{-1}$ ) | Nd<br>( $\mu\text{g l}^{-1}$ ) | Sm<br>( $\mu\text{g l}^{-1}$ ) | Gd<br>( $\mu\text{g l}^{-1}$ ) | Tb<br>( $\mu\text{g l}^{-1}$ ) | Dy<br>( $\mu\text{g l}^{-1}$ ) | Ho<br>( $\mu\text{g l}^{-1}$ ) | Er<br>( $\mu\text{g l}^{-1}$ ) | Tm<br>( $\mu\text{g l}^{-1}$ ) | Yb<br>( $\mu\text{g l}^{-1}$ ) | Lu<br>( $\mu\text{g l}^{-1}$ ) | $\Sigma\text{REE}$<br>( $\mu\text{g l}^{-1}$ ) |
|--------|-------------------------------|--------------------------------|--------------------------------|--------------------------------|--------------------------------|--------------------------------|--------------------------------|--------------------------------|--------------------------------|--------------------------------|--------------------------------|--------------------------------|--------------------------------|--------------------------------|------------------------------------------------|
| II/04  | 0.072                         | 0.094                          | 0.17                           | 0.023                          | 0.089                          | 0.02                           | 0.016                          | 0.0025                         | 0.013                          | 0.0025                         | 0.0068                         | 0.00078                        | 0.0049                         | 0.00069                        | 0.51                                           |
| III/04 | 0.044                         | 0.068                          | 0.13                           | 0.015                          | 0.058                          | 0.012                          | 0.014                          | 0.0018                         | 0.0086                         | 0.0016                         | 0.0044                         | 0.00054                        | 0.0033                         | 0.00047                        | 0.36                                           |
| IV/04  | 0.044                         | 0.063                          | 0.13                           | 0.015                          | 0.056                          | 0.012                          | 0.013                          | 0.0016                         | 0.0087                         | 0.0016                         | 0.0045                         | 0.00055                        | 0.0031                         | 0.00048                        | 0.35                                           |
| I/05   | 0.015                         | 0.027                          | 0.044                          | 0.0052                         | 0.019                          | 0.0041                         | 0.0059                         | 0.00055                        | 0.0028                         | 0.00055                        | 0.0016                         | 0.00016                        | 0.0013                         | 0.00016                        | 0.13                                           |
| II/05  | 0.038                         | 0.058                          | 0.11                           | 0.013                          | 0.05                           | 0.011                          | 0.011                          | 0.0015                         | 0.0075                         | 0.0014                         | 0.0039                         | 0.00049                        | 0.0027                         | 0.00036                        | 0.31                                           |
| III/05 | 0.03                          | 0.046                          | 0.087                          | 0.01                           | 0.038                          | 0.0086                         | 0.01                           | 0.0011                         | 0.006                          | 0.001                          | 0.0029                         | 0.00031                        | 0.0025                         | 0.00024                        | 0.24                                           |
| IV/05  | 0.042                         | 0.057                          | 0.11                           | 0.014                          | 0.055                          | 0.013                          | 0.01                           | 0.0015                         | 0.0083                         | 0.0016                         | 0.0039                         | 0.00048                        | 0.0031                         | 0.00036                        | 0.32                                           |
| I/06   | 0.013                         | 0.018                          | 0.031                          | 0.004                          | 0.015                          | 0.0037                         | 0.0032                         | 0.00044                        | 0.0022                         | 0.00044                        | 0.0012                         | 0.00015                        | 0.0011                         | 0.00015                        | 0.095                                          |
| II/06  | 0.023                         | 0.034                          | 0.056                          | 0.0075                         | 0.028                          | 0.0071                         | 0.0055                         | 0.0008                         | 0.0044                         | 0.0008                         | 0.0023                         | 0.00029                        | 0.0019                         | 0.00025                        | 0.17                                           |
| III/06 | 0.055                         | 0.063                          | 0.12                           | 0.016                          | 0.064                          | 0.013                          | 0.0099                         | 0.0017                         | 0.0096                         | 0.0018                         | 0.0051                         | 0.00065                        | 0.004                          | 0.00053                        | 0.37                                           |
| IV/06  | 0.064                         | 0.088                          | 0.18                           | 0.024                          | 0.093                          | 0.021                          | 0.015                          | 0.0026                         | 0.014                          | 0.0024                         | 0.006                          | 0.00076                        | 0.0042                         | 0.00054                        | 0.51                                           |
|        | (La/Yb) <sub>N</sub>          | Ce/Ce*                         | Gd/Gd*                         | Y/Ho                           | Al<br>( $\text{mg l}^{-1}$ )   | Ca<br>( $\text{mg l}^{-1}$ )   | Fe<br>( $\text{mg l}^{-1}$ )   | K<br>( $\text{mg l}^{-1}$ )    | Mg<br>( $\text{mg l}^{-1}$ )   | Mn<br>( $\text{mg l}^{-1}$ )   | Na<br>( $\text{mg l}^{-1}$ )   | P<br>( $\text{mg l}^{-1}$ )    | S<br>( $\text{mg l}^{-1}$ )    | Si<br>( $\text{mg l}^{-1}$ )   |                                                |
| II/04  | 1.9                           | 0.85                           | 0.91                           | 29                             | 0.04                           | n.a                            | 0.051                          | n.a                            | n.a                            | 0.014                          | n.a                            | n.a                            | n.a                            | n.a                            |                                                |
| III/04 | 2.1                           | 1                              | 1.2                            | 27                             | 0.024                          | n.a                            | 0.04                           | n.a                            | n.a                            | 0.0077                         | n.a                            | n.a                            | n.a                            | n.a                            |                                                |
| IV/04  | 2                             | 1                              | 1.2                            | 28                             | 0.036                          | n.a                            | 0.045                          | n.a                            | n.a                            | 0.0063                         | n.a                            | n.a                            | n.a                            | n.a                            |                                                |
| I/05   | 2.2                           | 1                              | 1.6                            | 28                             | 0.015                          | 0.13                           | 0.018                          | 0.014                          | 0.045                          | 0.03                           | 0.16                           | 0.0044                         | 0.36                           | 0.0075                         |                                                |
| II/05  | 2.1                           | 1                              | 1.2                            | 27                             | 0.021                          | 0.34                           | 0.023                          | 0.044                          | 0.051                          | 0.0083                         | 0.22                           | 0.0073                         | 0.52                           | 0.025                          |                                                |
| III/05 | 1.8                           | 1                              | 1.4                            | 29                             | 0.071                          | 0.24                           | 0.025                          | 0.077                          | 0.046                          | 0.0074                         | 0.067                          | 0.022                          | 0.64                           | 0.027                          |                                                |
| IV/05  | 1.8                           | 0.89                           | 0.97                           | 27                             | 0.029                          | 0.36                           | 0.03                           | 0.052                          | 0.063                          | 0.0062                         | 0.023                          | 0.009                          | 0.47                           | 0.033                          |                                                |
| I/06   | 1.7                           | 0.94                           | 1.1                            | 30                             | 0.0064                         | 0.11                           | 0.011                          | 0.062                          | 0.045                          | 0.016                          | 0.26                           | 0.0033                         | 0.56                           | 0.0099                         |                                                |
| II/06  | 1.8                           | 0.89                           | 0.98                           | 29                             | 0.019                          | 0.18                           | 0.016                          | 0.11                           | 0.027                          | 0.0059                         | 0.12                           | 0.02                           | 0.62                           | 0.0088                         |                                                |
| III/06 | 1.6                           | 0.89                           | 0.88                           | 30                             | 0.04                           | 0.55                           | 0.022                          | 0.33                           | 0.08                           | 0.0077                         | 0.066                          | 0.067                          | 0.59                           | 0.068                          |                                                |

Špičková et al.

---

|       |     |      |      |    |       |      |       |      |      |       |       |       |      |       |
|-------|-----|------|------|----|-------|------|-------|------|------|-------|-------|-------|------|-------|
| IV/06 | 2.1 | 0.86 | 0.87 | 26 | 0.025 | 0.32 | 0.027 | 0.24 | 0.08 | 0.021 | 0.035 | 0.033 | 0.49 | 0.039 |
|-------|-----|------|------|----|-------|------|-------|------|------|-------|-------|-------|------|-------|

**Table 2.** REE and major ions concentrations in beech throughfall (the Roman numeral signifies the number of the quarter (I–IV), the Arabic numeral indicates the year).

|        | Y<br>( $\mu\text{g l}^{-1}$ ) | La<br>( $\mu\text{g l}^{-1}$ ) | Ce<br>( $\mu\text{g l}^{-1}$ ) | Pr<br>( $\mu\text{g l}^{-1}$ ) | Nd<br>( $\mu\text{g l}^{-1}$ ) | Sm<br>( $\mu\text{g l}^{-1}$ ) | Gd<br>( $\mu\text{g l}^{-1}$ ) | Tb<br>( $\mu\text{g l}^{-1}$ ) | Dy<br>( $\mu\text{g l}^{-1}$ ) | Ho<br>( $\mu\text{g l}^{-1}$ ) | Er<br>( $\mu\text{g l}^{-1}$ ) | Tm<br>( $\mu\text{g l}^{-1}$ ) | Yb<br>( $\mu\text{g l}^{-1}$ ) | Lu<br>( $\mu\text{g l}^{-1}$ ) | $\Sigma\text{REE}$<br>( $\mu\text{g l}^{-1}$ ) |
|--------|-------------------------------|--------------------------------|--------------------------------|--------------------------------|--------------------------------|--------------------------------|--------------------------------|--------------------------------|--------------------------------|--------------------------------|--------------------------------|--------------------------------|--------------------------------|--------------------------------|------------------------------------------------|
| II/04  | 0.14                          | 0.17                           | 0.29                           | 0.04                           | 0.15                           | 0.031                          | 0.025                          | 0.0044                         | 0.024                          | 0.0046                         | 0.012                          | 0.0015                         | 0.0099                         | 0.0013                         | 0.9                                            |
| III/04 | 0.055                         | 0.085                          | 0.16                           | 0.018                          | 0.068                          | 0.014                          | 0.016                          | 0.0019                         | 0.0089                         | 0.0019                         | 0.0044                         | 0.00056                        | 0.0038                         | 0.00046                        | 0.44                                           |
| IV/04  | 0.11                          | 0.15                           | 0.29                           | 0.033                          | 0.13                           | 0.025                          | 0.027                          | 0.0037                         | 0.019                          | 0.0036                         | 0.0099                         | 0.0014                         | 0.0076                         | 0.0011                         | 0.81                                           |
| I/05   | 0.028                         | 0.045                          | 0.086                          | 0.0096                         | 0.037                          | 0.0075                         | 0.0084                         | 0.0011                         | 0.0054                         | 0.0012                         | 0.0028                         | 0.00037                        | 0.002                          | 0.00026                        | 0.23                                           |
| II/05  | 0.11                          | 0.15                           | 0.31                           | 0.036                          | 0.14                           | 0.03                           | 0.031                          | 0.0041                         | 0.021                          | 0.0038                         | 0.011                          | 0.0013                         | 0.0077                         | 0.0011                         | 0.85                                           |
| III/05 | 0.049                         | 0.084                          | 0.15                           | 0.017                          | 0.062                          | 0.013                          | 0.015                          | 0.0015                         | 0.007                          | 0.0014                         | 0.0041                         | 0.00045                        | 0.0033                         | 0.00045                        | 0.41                                           |
| IV/05  | 0.094                         | 0.13                           | 0.23                           | 0.03                           | 0.12                           | 0.025                          | 0.021                          | 0.0032                         | 0.017                          | 0.0031                         | 0.0084                         | 0.00094                        | 0.0062                         | 0.00081                        | 0.68                                           |
| I/06   | 0.039                         | 0.057                          | 0.095                          | 0.013                          | 0.049                          | 0.011                          | 0.0078                         | 0.0012                         | 0.007                          | 0.0013                         | 0.0035                         | 0.00051                        | 0.0029                         | 0.00041                        | 0.29                                           |
| II/06  | 0.04                          | 0.06                           | 0.096                          | 0.012                          | 0.048                          | 0.0098                         | 0.0076                         | 0.0013                         | 0.007                          | 0.0014                         | 0.0037                         | 0.00045                        | 0.0028                         | 0.00041                        | 0.29                                           |
| III/06 | 0.089                         | 0.13                           | 0.25                           | 0.032                          | 0.13                           | 0.026                          | 0.018                          | 0.0029                         | 0.015                          | 0.0027                         | 0.0074                         | 0.00092                        | 0.0056                         | 0.00077                        | 0.7                                            |
| IV/06  | 0.069                         | 0.094                          | 0.16                           | 0.022                          | 0.083                          | 0.018                          | 0.013                          | 0.0023                         | 0.012                          | 0.0023                         | 0.0062                         | 0.0008                         | 0.0046                         | 0.00065                        | 0.49                                           |
|        | (La/Yb) <sub>N</sub>          | Ce/Ce*                         | Gd/Gd*                         | Y/Ho                           | Al<br>( $\text{mg l}^{-1}$ )   | Ca<br>( $\text{mg l}^{-1}$ )   | Fe<br>( $\text{mg l}^{-1}$ )   | K<br>( $\text{mg l}^{-1}$ )    | Mg<br>( $\text{mg l}^{-1}$ )   | Mn<br>( $\text{mg l}^{-1}$ )   | Na<br>( $\text{mg l}^{-1}$ )   | P<br>( $\text{mg l}^{-1}$ )    | S<br>( $\text{mg l}^{-1}$ )    | Si<br>( $\text{mg l}^{-1}$ )   |                                                |
| II/04  | 1.7                           | 0.87                           | 0.87                           | 30                             | 0.049                          | n.a                            | 0.056                          | n.a                            | n.a                            | 0.073                          | n.a                            | n.a                            | n.a                            | n.a                            |                                                |
| III/04 | 2.2                           | 1.1                            | 1.3                            | 30                             | 0.03                           | n.a                            | 0.048                          | n.a                            | n.a                            | 0.12                           | n.a                            | n.a                            | n.a                            | n.a                            |                                                |
| IV/04  | 2                             | 1.1                            | 1.2                            | 30                             | 0.047                          | n.a                            | 0.062                          | n.a                            | n.a                            | 0.15                           | n.a                            | n.a                            | n.a                            | n.a                            |                                                |
| I/05   | 2.2                           | 1.1                            | 1.2                            | 25                             | 0.025                          | 0.57                           | 0.018                          | 1.3                            | 0.14                           | 0.06                           | 0.3                            | 0.068                          | 0.96                           | 0.029                          |                                                |
| II/05  | 2                             | 1                              | 1.1                            | 29                             | 0.065                          | 1.5                            | 0.056                          | 1.2                            | 0.24                           | 0.07                           | 0.46                           | 0.056                          | 1.4                            | 0.078                          |                                                |
| III/05 | 2.6                           | 1.1                            | 1.5                            | 36                             | 0.083                          | 0.96                           | 0.044                          | 1.4                            | 0.24                           | 0.1                            | 0.14                           | 0.1                            | 1.1                            | 0.12                           |                                                |
| IV/05  | 2.1                           | 0.9                            | 0.98                           | 31                             | 0.046                          | 1.3                            | 0.049                          | 1.3                            | 0.88                           | 0.12                           | 0.072                          | 0.082                          | 1.1                            | 0.19                           |                                                |
| I/06   | 2                             | 0.87                           | 0.89                           | 29                             | 0.032                          | 1.1                            | 0.033                          | 1.6                            | 0.25                           | 0.13                           | 0.49                           | 0.035                          | 1.8                            | 0.042                          |                                                |
| II/06  | 2.1                           | 0.93                           | 0.88                           | 29                             | 0.016                          | 0.75                           | 0.035                          | 0.79                           | 0.14                           | 0.06                           | 0.29                           | 0.073                          | 1.1                            | 0.047                          |                                                |
| III/06 | 2.3                           | 0.91                           | 0.87                           | 33                             | 0.021                          | 1.1                            | 0.021                          | 1.6                            | 0.26                           | 0.091                          | 0.089                          | 0.16                           | 1                              | 0.034                          |                                                |

Špičková et al.

---

|       |     |      |      |    |       |     |       |     |     |      |       |       |      |      |
|-------|-----|------|------|----|-------|-----|-------|-----|-----|------|-------|-------|------|------|
| IV/06 | 2.1 | 0.89 | 0.84 | 30 | 0.017 | 1.2 | 0.036 | 1.3 | 0.2 | 0.12 | 0.084 | 0.029 | 0.98 | 0.17 |
|-------|-----|------|------|----|-------|-----|-------|-----|-----|------|-------|-------|------|------|

**Table 3.** REE and major ions concentrations in spruce throughfall (the Roman numeral signifies the number of the quarter (I–IV), the Arabic numeral indicates the year; n.a. – not analysed).

|        | Y<br>( $\mu\text{g l}^{-1}$ ) | La<br>( $\mu\text{g l}^{-1}$ ) | Ce<br>( $\mu\text{g l}^{-1}$ ) | Pr<br>( $\mu\text{g l}^{-1}$ ) | Nd<br>( $\mu\text{g l}^{-1}$ ) | Sm<br>( $\mu\text{g l}^{-1}$ ) | Gd<br>( $\mu\text{g l}^{-1}$ ) | Tb<br>( $\mu\text{g l}^{-1}$ ) | Dy<br>( $\mu\text{g l}^{-1}$ ) | Ho<br>( $\mu\text{g l}^{-1}$ ) | Er<br>( $\mu\text{g l}^{-1}$ ) | Tm<br>( $\mu\text{g l}^{-1}$ ) | Yb<br>( $\mu\text{g l}^{-1}$ ) | Lu<br>( $\mu\text{g l}^{-1}$ ) | $\Sigma\text{REE}$<br>( $\mu\text{g l}^{-1}$ ) |
|--------|-------------------------------|--------------------------------|--------------------------------|--------------------------------|--------------------------------|--------------------------------|--------------------------------|--------------------------------|--------------------------------|--------------------------------|--------------------------------|--------------------------------|--------------------------------|--------------------------------|------------------------------------------------|
| II/04  | 0.2                           | 0.24                           | 0.44                           | 0.061                          | 0.23                           | 0.05                           | 0.038                          | 0.0069                         | 0.037                          | 0.0069                         | 0.019                          | 0.0025                         | 0.015                          | 0.002                          | 1.4                                            |
| III/04 | 0.088                         | 0.13                           | 0.26                           | 0.029                          | 0.11                           | 0.022                          | 0.026                          | 0.003                          | 0.015                          | 0.0028                         | 0.0075                         | 0.00096                        | 0.0056                         | 0.00078                        | 0.7                                            |
| IV/04  | 0.11                          | 0.15                           | 0.3                            | 0.033                          | 0.13                           | 0.025                          | 0.029                          | 0.004                          | 0.02                           | 0.004                          | 0.01                           | 0.0013                         | 0.0077                         | 0.001                          | 0.83                                           |
| I/05   | 0.055                         | 0.079                          | 0.16                           | 0.017                          | 0.067                          | 0.015                          | 0.017                          | 0.002                          | 0.011                          | 0.002                          | 0.0057                         | 0.00076                        | 0.0044                         | 0.00061                        | 0.43                                           |
| II/05  | 0.11                          | 0.16                           | 0.32                           | 0.036                          | 0.14                           | 0.029                          | 0.031                          | 0.0041                         | 0.021                          | 0.0041                         | 0.012                          | 0.0014                         | 0.008                          | 0.0012                         | 0.86                                           |
| III/05 | 0.075                         | 0.11                           | 0.22                           | 0.023                          | 0.089                          | 0.019                          | 0.023                          | 0.0025                         | 0.014                          | 0.0025                         | 0.0068                         | 0.00092                        | 0.0051                         | 0.00077                        | 0.59                                           |
| IV/05  | 0.082                         | 0.13                           | 0.22                           | 0.028                          | 0.1                            | 0.021                          | 0.017                          | 0.0029                         | 0.015                          | 0.0028                         | 0.0074                         | 0.00088                        | 0.0047                         | 0.00081                        | 0.63                                           |
| I/06   | 0.061                         | 0.079                          | 0.14                           | 0.019                          | 0.073                          | 0.016                          | 0.012                          | 0.002                          | 0.011                          | 0.0022                         | 0.0061                         | 0.00076                        | 0.0049                         | 0.00076                        | 0.43                                           |
| II/06  | 0.053                         | 0.075                          | 0.13                           | 0.017                          | 0.065                          | 0.013                          | 0.01                           | 0.0018                         | 0.0094                         | 0.0018                         | 0.0052                         | 0.0006                         | 0.0043                         | 0.0006                         | 0.38                                           |
| III/06 | 0.097                         | 0.13                           | 0.24                           | 0.03                           | 0.11                           | 0.023                          | 0.018                          | 0.0031                         | 0.017                          | 0.0034                         | 0.008                          | 0.001                          | 0.0064                         | 0.00086                        | 0.69                                           |
| IV/06  | 0.081                         | 0.12                           | 0.2                            | 0.026                          | 0.097                          | 0.022                          | 0.016                          | 0.0027                         | 0.014                          | 0.0027                         | 0.0075                         | 0.00094                        | 0.0052                         | 0.00078                        | 0.59                                           |
|        | (La/Yb) <sub>N</sub>          | Ce/Ce*                         | Gd/Gd*                         | Y/Ho                           | Al<br>( $\text{mg l}^{-1}$ )   | Ca<br>( $\text{mg l}^{-1}$ )   | Fe<br>( $\text{mg l}^{-1}$ )   | K<br>( $\text{mg l}^{-1}$ )    | Mg<br>( $\text{mg l}^{-1}$ )   | Mn<br>( $\text{mg l}^{-1}$ )   | Na<br>( $\text{mg l}^{-1}$ )   | P<br>( $\text{mg l}^{-1}$ )    | S<br>( $\text{mg l}^{-1}$ )    | Si<br>( $\text{mg l}^{-1}$ )   |                                                |
| II/04  | 1.6                           | 0.87                           | 0.85                           | 29                             | 0.14                           | n.a                            | 0.1                            | n.a                            | n.a                            | 0.66                           | n.a                            | n.a                            | n.a                            | n.a                            |                                                |
| III/04 | 2.4                           | 1.1                            | 1.3                            | 32                             | 0.044                          | n.a                            | 0.079                          | n.a                            | n.a                            | 0.16                           | n.a                            | n.a                            | n.a                            | n.a                            |                                                |
| IV/04  | 2                             | 1.1                            | 1.2                            | 28                             | 0.047                          | n.a                            | 0.062                          | n.a                            | n.a                            | 0.11                           | n.a                            | n.a                            | n.a                            | n.a                            |                                                |
| I/05   | 1.8                           | 1.1                            | 1.3                            | 28                             | 0.052                          | 1.3                            | 0.041                          | 2.1                            | 0.43                           | 0.33                           | 0.5                            | 0.093                          | 2.7                            | 0.066                          |                                                |
| II/05  | 1.9                           | 1.1                            | 1.2                            | 26                             | 0.14                           | 3.1                            | 0.087                          | 1.8                            | 0.77                           | 0.59                           | 0.76                           | 0.13                           | 4.3                            | 0.11                           |                                                |
| III/05 | 2.2                           | 1.1                            | 1.4                            | 30                             | 0.14                           | 0.81                           | 0.055                          | 1.7                            | 0.23                           | 0.15                           | 0.18                           | 0.1                            | 1.7                            | 0.088                          |                                                |
| IV/05  | 2.8                           | 0.94                           | 0.89                           | 30                             | 0.042                          | 0.7                            | 0.05                           | 1.5                            | 0.17                           | 0.1                            | 0.094                          | 0.071                          | 1.1                            | 0.072                          |                                                |
| I/06   | 1.6                           | 0.89                           | 0.86                           | 28                             | 0.083                          | 3.1                            | 0.052                          | 4                              | 1                              | 0.88                           | 0.84                           | 0.066                          | 6.7                            | 0.071                          |                                                |
| II/06  | 1.7                           | 0.9                            | 0.88                           | 29                             | 0.074                          | 2.1                            | 0.057                          | 1.5                            | 0.54                           | 0.44                           | 0.47                           | 0.075                          | 3.5                            | 0.083                          |                                                |
| III/06 | 2                             | 0.96                           | 0.9                            | 29                             | 0.035                          | 0.75                           | 0.029                          | 2.2                            | 0.21                           | 0.12                           | 0.14                           | 0.21                           | 1.4                            | 0.12                           |                                                |

Špičková et al.

---

|       |     |      |      |    |       |     |       |     |      |      |      |      |     |       |
|-------|-----|------|------|----|-------|-----|-------|-----|------|------|------|------|-----|-------|
| IV/06 | 2.2 | 0.92 | 0.86 | 30 | 0.042 | 0.7 | 0.062 | 2.4 | 0.19 | 0.12 | 0.11 | 0.11 | 1.3 | 0.071 |
|-------|-----|------|------|----|-------|-----|-------|-----|------|------|------|------|-----|-------|

**Table 4.** REE and major ions concentrations in tree foliage of European beech (*Fagus sylvatica*) and Norway spruce (*Picea Abies*) (n.d. – not detected).

|          | Y<br>( $\mu\text{g l}^{-1}$ )                  | La<br>( $\mu\text{g l}^{-1}$ ) | Ce<br>( $\mu\text{g l}^{-1}$ ) | Pr<br>( $\mu\text{g l}^{-1}$ ) | Nd<br>( $\mu\text{g l}^{-1}$ ) | Sm<br>( $\mu\text{g l}^{-1}$ ) | Gd<br>( $\mu\text{g l}^{-1}$ ) | Tb<br>( $\mu\text{g l}^{-1}$ ) | Dy<br>( $\mu\text{g l}^{-1}$ ) | Ho<br>( $\mu\text{g l}^{-1}$ ) | Er<br>( $\mu\text{g l}^{-1}$ ) | Tm<br>( $\mu\text{g l}^{-1}$ ) | Yb<br>( $\mu\text{g l}^{-1}$ ) | Lu<br>( $\mu\text{g l}^{-1}$ ) |
|----------|------------------------------------------------|--------------------------------|--------------------------------|--------------------------------|--------------------------------|--------------------------------|--------------------------------|--------------------------------|--------------------------------|--------------------------------|--------------------------------|--------------------------------|--------------------------------|--------------------------------|
| beech 1  | 470                                            | 720                            | 940                            | 160                            | 590                            | 120                            | 87                             | 15                             | 76                             | 14                             | 34                             | 4.4                            | 20                             | 2.6                            |
| beech 2  | 120                                            | 160                            | 220                            | 37                             | 140                            | 31                             | 24                             | 3.5                            | 18                             | 3.5                            | 9.5                            | 1.4                            | 5.9                            | 0.79                           |
| beech 3  | 80                                             | 140                            | 240                            | 31                             | 110                            | 22                             | 16                             | 2.8                            | 14                             | 2.8                            | 7.5                            | 1.1                            | 7.3                            | 1.1                            |
| beech 4  | 120                                            | 150                            | 230                            | 34                             | 130                            | 28                             | 27                             | 3.7                            | 20                             | 3.7                            | 9.1                            | 1.3                            | 7.6                            | 1.1                            |
| spruce 1 | 16                                             | 21                             | 32                             | 4.1                            | 17                             | 2.4                            | 1.8                            | 0.39                           | 2.6                            | 0.59                           | 1.2                            | 0.39                           | 1.2                            | 0.2                            |
| spruce 2 | 45                                             | 59                             | 100                            | 13                             | 52                             | 9.4                            | 9.2                            | 1.2                            | 7.4                            | 1.2                            | 4                              | 0.6                            | 3.4                            | 0.4                            |
| spruce 3 | 33                                             | 43                             | 68                             | 8.2                            | 30                             | 6.2                            | 5.5                            | 0.9                            | 4.1                            | 0.9                            | 2.7                            | 0.3                            | 2                              | 0.3                            |
| spruce 4 | 21                                             | 26                             | 44                             | 5.4                            | 19                             | 5.2                            | 3.8                            | 0.59                           | 2.8                            | 0.59                           | 1.6                            | 0.3                            | 1.6                            | 0.2                            |
| spruce 5 | 8.2                                            | 13                             | 22                             | 2.4                            | 8.4                            | 2.2                            | 2.3                            | 0.2                            | 1.3                            | 0.2                            | 0.89                           | 0.099                          | 0.49                           | 0.099                          |
|          | $\Sigma\text{REE}$<br>( $\mu\text{g l}^{-1}$ ) | (La/Yb) <sub>ucc</sub>         | Ce/Ce*                         | Gd/Gd*                         | Y/Ho                           | Al<br>( $\text{mg l}^{-1}$ )   | Ca<br>( $\text{mg l}^{-1}$ )   | Fe<br>( $\text{mg l}^{-1}$ )   | K<br>( $\text{mg l}^{-1}$ )    | Mg<br>( $\text{mg l}^{-1}$ )   | Mn<br>( $\text{mg l}^{-1}$ )   | Na<br>( $\text{mg l}^{-1}$ )   | P<br>( $\text{mg l}^{-1}$ )    | S<br>( $\text{mg l}^{-1}$ )    |
| beech 1  | 3300                                           | 3.6                            | 0.69                           | 0.88                           | 33                             | 130                            | 7300                           | 130                            | 7400                           | 1800                           | 890                            | 48                             | 1300                           | 1300                           |
| beech 2  | 770                                            | 2.7                            | 0.72                           | 0.96                           | 33                             | 99                             | 7500                           | 110                            | 8200                           | 2200                           | 1100                           | 53                             | 1300                           | 1200                           |
| beech 3  | 680                                            | 2                              | 0.94                           | 0.84                           | 29                             | 220                            | 7400                           | 200                            | 12000                          | 1600                           | 840                            | 56                             | 1600                           | 1700                           |
| beech 4  | 770                                            | 2                              | 0.81                           | 1.1                            | 33                             | 150                            | 9300                           | 150                            | 10000                          | 2500                           | 1400                           | 69                             | 1400                           | 1300                           |
| spruce 1 | 100                                            | 1.8                            | 0.93                           | 0.73                           | 28                             | 60                             | 2600                           | 40                             | 14000                          | 940                            | 1800                           | 7.4                            | 1600                           | 950                            |
| spruce 2 | 310                                            | 1.7                            | 0.89                           | 1.1                            | 38                             | 71                             | 2500                           | 39                             | 10000                          | 820                            | 1200                           | 13                             | 2100                           | 1300                           |
| spruce 3 | 200                                            | 2.1                            | 0.99                           | 0.95                           | 37                             | 66                             | 1900                           | 39                             | 12000                          | 810                            | 1300                           | 1.9                            | 1900                           | 860                            |
| spruce 4 | 130                                            | 1.6                            | 0.98                           | 0.91                           | 35                             | 68                             | 2200                           | 38                             | 13000                          | 900                            | 1700                           | 5.4                            | 1800                           | 900                            |
| spruce 5 | 62                                             | 2.7                            | 1.1                            | 1.5                            | 41                             | 70                             | 2400                           | 30                             | 11000                          | 1300                           | 1100                           | n.d.                           | 1900                           | 1300                           |

**Table 5.** REE and major ions concentrations in lichens (*Hypogymnia physodes*).

|           | Y<br>( $\mu\text{g l}^{-1}$ )                  | La<br>( $\mu\text{g l}^{-1}$ ) | Ce<br>( $\mu\text{g l}^{-1}$ ) | Pr<br>( $\mu\text{g l}^{-1}$ ) | Nd<br>( $\mu\text{g l}^{-1}$ ) | Sm<br>( $\mu\text{g l}^{-1}$ ) | Gd<br>( $\mu\text{g l}^{-1}$ ) | Tb<br>( $\mu\text{g l}^{-1}$ ) | Dy<br>( $\mu\text{g l}^{-1}$ ) | Ho<br>( $\mu\text{g l}^{-1}$ ) | Er<br>( $\mu\text{g l}^{-1}$ ) | Tm<br>( $\mu\text{g l}^{-1}$ ) | Yb<br>( $\mu\text{g l}^{-1}$ ) | Lu<br>( $\mu\text{g l}^{-1}$ ) |
|-----------|------------------------------------------------|--------------------------------|--------------------------------|--------------------------------|--------------------------------|--------------------------------|--------------------------------|--------------------------------|--------------------------------|--------------------------------|--------------------------------|--------------------------------|--------------------------------|--------------------------------|
| lichen 1  | 270                                            | 420                            | 750                            | 100                            | 360                            | 74                             | 52                             | 10                             | 53                             | 10                             | 28                             | 4.1                            | 27                             | 3.9                            |
| lichen 2  | 360                                            | 550                            | 970                            | 130                            | 470                            | 95                             | 65                             | 11                             | 64                             | 13                             | 36                             | 5.3                            | 34                             | 5.1                            |
| lichen 3  | 220                                            | 300                            | 530                            | 69                             | 250                            | 49                             | 38                             | 6.4                            | 37                             | 7.4                            | 22                             | 3.2                            | 21                             | 3.2                            |
| lichen 4  | 240                                            | 370                            | 660                            | 87                             | 320                            | 65                             | 45                             | 8.1                            | 44                             | 8.1                            | 23                             | 3.4                            | 21                             | 3.1                            |
| lichen 5  | 270                                            | 420                            | 760                            | 100                            | 380                            | 77                             | 51                             | 9.3                            | 50                             | 9.5                            | 27                             | 3.9                            | 25                             | 3.8                            |
| lichen 6  | 380                                            | 570                            | 1000                           | 140                            | 490                            | 97                             | 70                             | 12                             | 68                             | 14                             | 40                             | 5.4                            | 36                             | 5.3                            |
| lichen 7  | 330                                            | 530                            | 940                            | 120                            | 450                            | 91                             | 61                             | 11                             | 62                             | 12                             | 33                             | 4.7                            | 30                             | 4.6                            |
| lichen 8  | 400                                            | 640                            | 1100                           | 150                            | 560                            | 120                            | 75                             | 14                             | 75                             | 14                             | 41                             | 6.1                            | 39                             | 5.8                            |
| lichen 9  | 710                                            | 1000                           | 1900                           | 250                            | 920                            | 170                            | 130                            | 22                             | 120                            | 24                             | 69                             | 9.4                            | 62                             | 9.1                            |
| lichen 10 | 310                                            | 500                            | 890                            | 120                            | 450                            | 92                             | 61                             | 11                             | 61                             | 11                             | 31                             | 4.5                            | 29                             | 4.3                            |
| lichen 11 | 360                                            | 600                            | 1100                           | 140                            | 530                            | 110                            | 72                             | 13                             | 71                             | 13                             | 37                             | 5.3                            | 34                             | 5                              |
| lichen 12 | 510                                            | 710                            | 1300                           | 170                            | 610                            | 120                            | 86                             | 16                             | 87                             | 17                             | 50                             | 7.2                            | 43                             | 6.2                            |
| lichen 13 | 530                                            | 740                            | 1300                           | 170                            | 600                            | 120                            | 89                             | 15                             | 86                             | 18                             | 49                             | 6.5                            | 42                             | 6.2                            |
|           | $\Sigma\text{REE}$<br>( $\mu\text{g l}^{-1}$ ) | (La/Yb) <sub>UCC</sub>         | Ce/Ce*                         | Gd/Gd*                         | Y/Ho                           | Al<br>( $\text{mg l}^{-1}$ )   | Ca<br>( $\text{mg l}^{-1}$ )   | Fe<br>( $\text{mg l}^{-1}$ )   | K<br>( $\text{mg l}^{-1}$ )    | Mg<br>( $\text{mg l}^{-1}$ )   | Mn<br>( $\text{mg l}^{-1}$ )   | Na<br>( $\text{mg l}^{-1}$ )   | P<br>( $\text{mg l}^{-1}$ )    | S<br>( $\text{mg l}^{-1}$ )    |
| lichen 1  | 2200                                           | 1.5                            | 0.89                           | 0.78                           | 27                             | 560                            | 2000                           | 400                            | 3900                           | 510                            | 350                            | 59                             | 1200                           | 1000                           |
| lichen 2  | 2800                                           | 1.6                            | 0.89                           | 0.84                           | 28                             | 790                            | 3600                           | 560                            | 5100                           | 540                            | 370                            | 100                            | 2000                           | 1300                           |
| lichen 3  | 1600                                           | 1.4                            | 0.91                           | 0.9                            | 29                             | 490                            | 3400                           | 310                            | 4800                           | 460                            | 290                            | 280                            | 1900                           | 1000                           |
| lichen 4  | 1900                                           | 1.8                            | 0.9                            | 0.82                           | 29                             | 400                            | 2200                           | 320                            | 4300                           | 500                            | 270                            | 75                             | 1700                           | 1200                           |
| lichen 5  | 2200                                           | 1.7                            | 0.87                           | 0.8                            | 28                             | 550                            | 2400                           | 400                            | 4400                           | 530                            | 280                            | 62                             | 1300                           | 1400                           |
| lichen 6  | 3000                                           | 1.6                            | 0.9                            | 0.86                           | 28                             | 730                            | 9000                           | 530                            | 3900                           | 560                            | 370                            | 100                            | 1100                           | 1200                           |
| lichen 7  | 2700                                           | 1.8                            | 0.9                            | 0.82                           | 29                             | 610                            | 5600                           | 420                            | 3900                           | 550                            | 340                            | 67                             | 1100                           | 1200                           |
| lichen 8  | 3300                                           | 1.6                            | 0.89                           | 0.8                            | 28                             | 790                            | 1700                           | 620                            | 4200                           | 540                            | 230                            | 100                            | 1300                           | 1500                           |
| lichen 9  | 5400                                           | 1.7                            | 0.9                            | 0.85                           | 30                             | 1000                           | 22000                          | 820                            | 4500                           | 660                            | 550                            | 170                            | 830                            | 1500                           |
| lichen 10 | 2600                                           | 1.7                            | 0.88                           | 0.81                           | 27                             | 610                            | 1500                           | 540                            | 3400                           | 400                            | 430                            | 64                             | 600                            | 1200                           |



Špičková et al.

|           |      |     |      |      |    |     |       |     |      |     |     |     |      |      |
|-----------|------|-----|------|------|----|-----|-------|-----|------|-----|-----|-----|------|------|
| lichen 11 | 3100 | 1.8 | 0.89 | 0.8  | 27 | 760 | 1600  | 660 | 3400 | 420 | 440 | 77  | 620  | 1300 |
| lichen 12 | 3700 | 1.6 | 0.9  | 0.82 | 30 | 700 | 16000 | 520 | 4900 | 590 | 710 | 93  | 1200 | 1300 |
| lichen 13 | 3800 | 1.8 | 0.93 | 0.87 | 30 | 580 | 20000 | 440 | 4300 | 510 | 730 | 100 | 840  | 1200 |
